# Supplementary material for: Dual Targeting of BRAF and mTOR Signaling in Melanoma Cells with Pyridinyl Imidazole Compounds
Source: MDPI journal article supplement (doi:10.3390/cancers12061516), 2020-06-10

Two additional replicates of Fig. 1C

2nd experiment

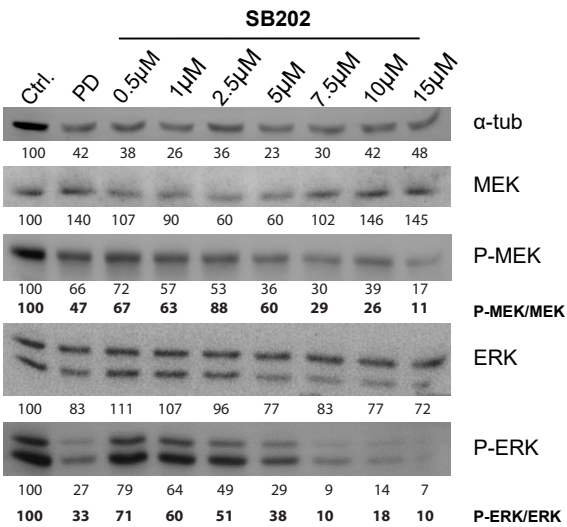

3rd experiment

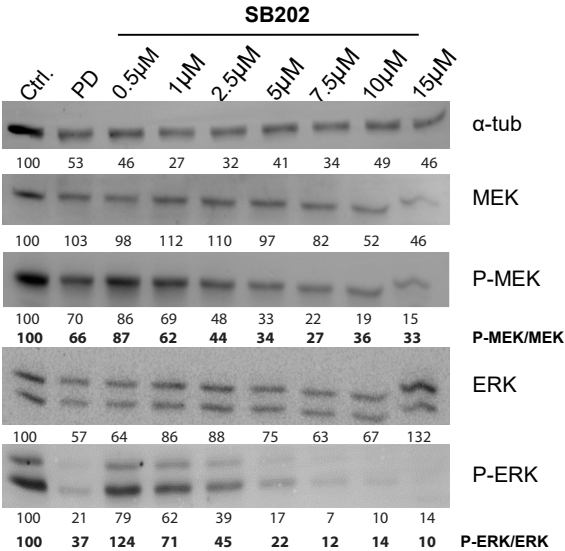

2nd experiment

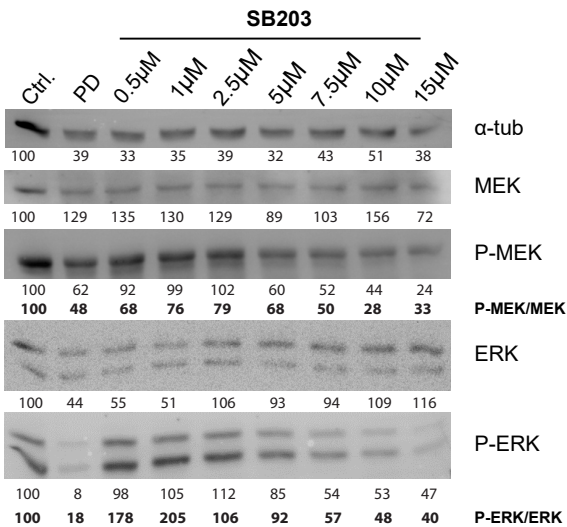

3rd experiment

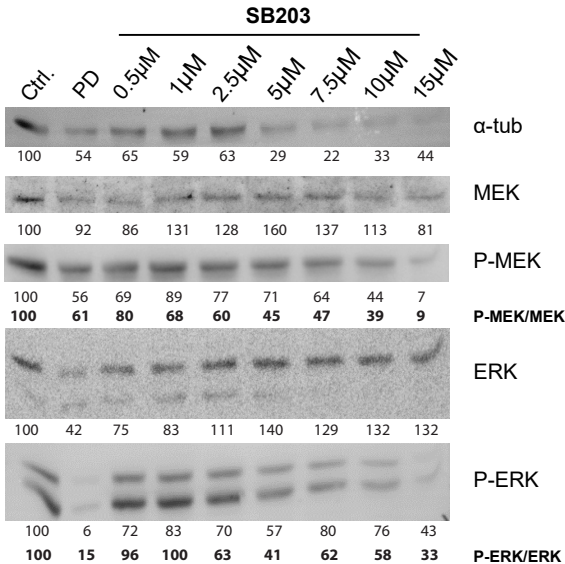

## Two additional replicates of Fig. 1D

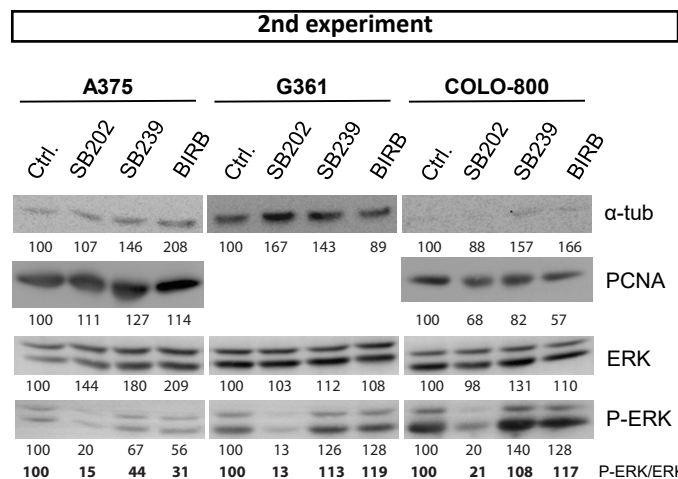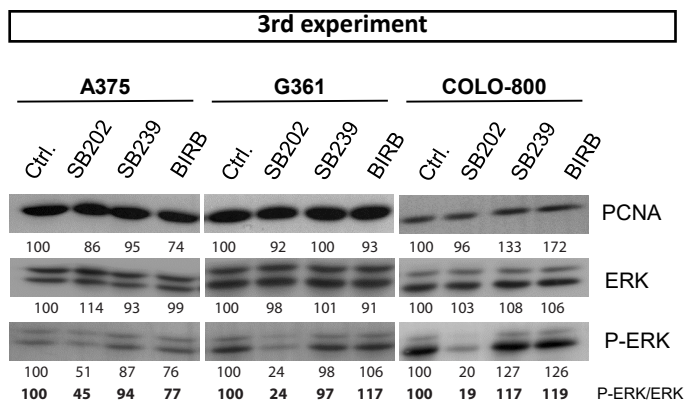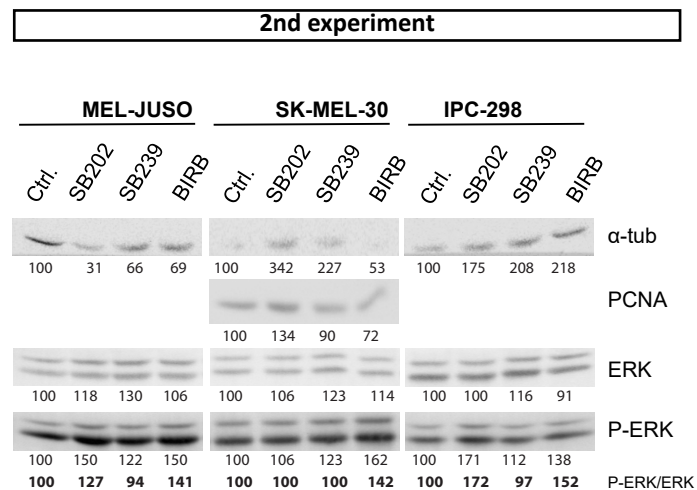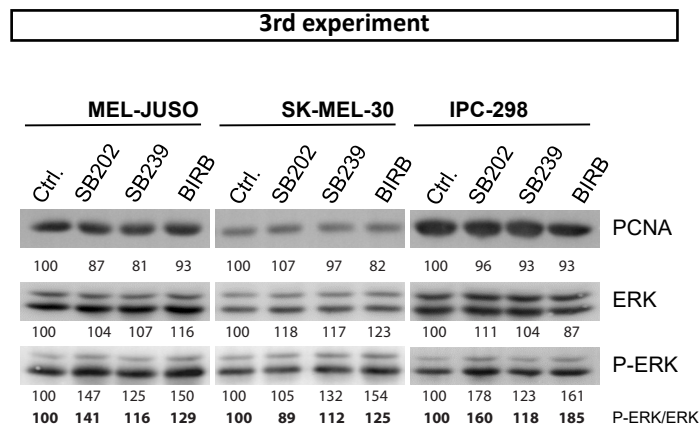

Two additional replicates of Fig. 6C

2nd experiment

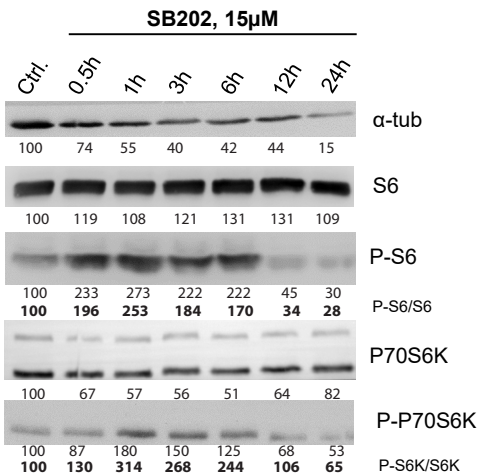

3rd experiment

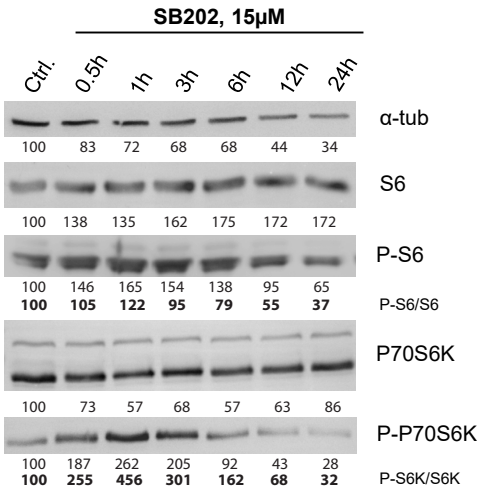

2nd experiment

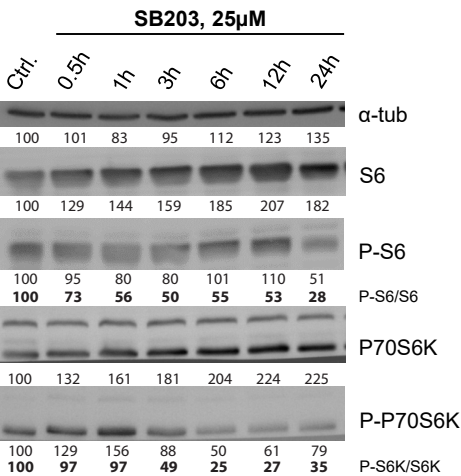

3rd experiment

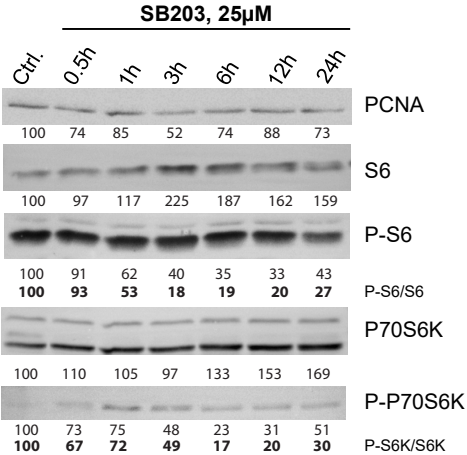

2nd experiment

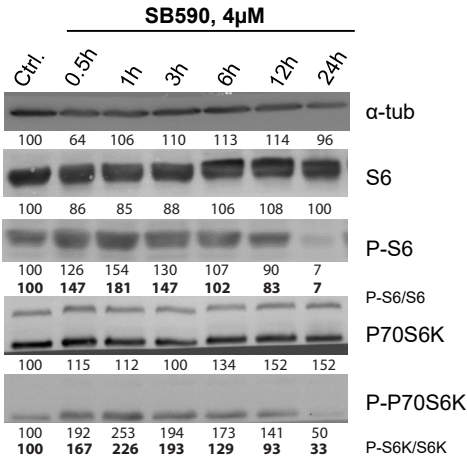

3rd experiment

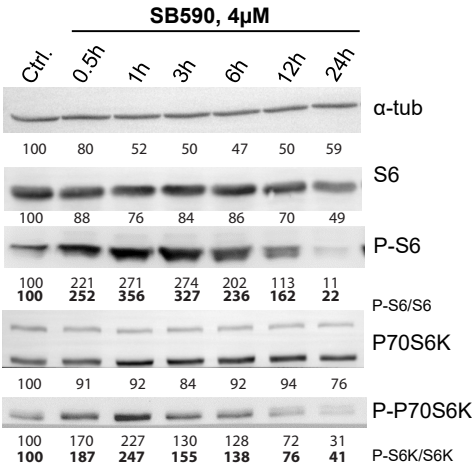

## Two additional replicates of Fig. 6E

2nd experiment

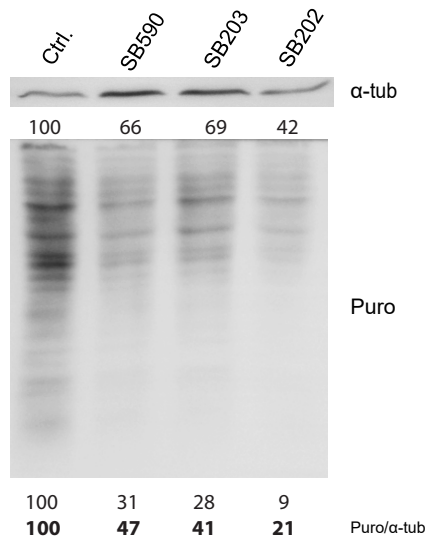

3rd experiment

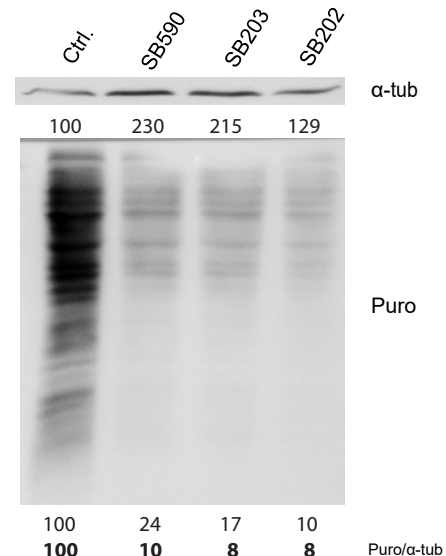

Supplement: s1 [file s1]
