# Supplementary figures and images for: Dual Targeting of BRAF and mTOR Signaling in Melanoma Cells with Pyridinyl Imidazole Compounds
Source: MDPI journal article supplement (doi:10.3390/cancers12061516), 2020-06-10

Figure 1C

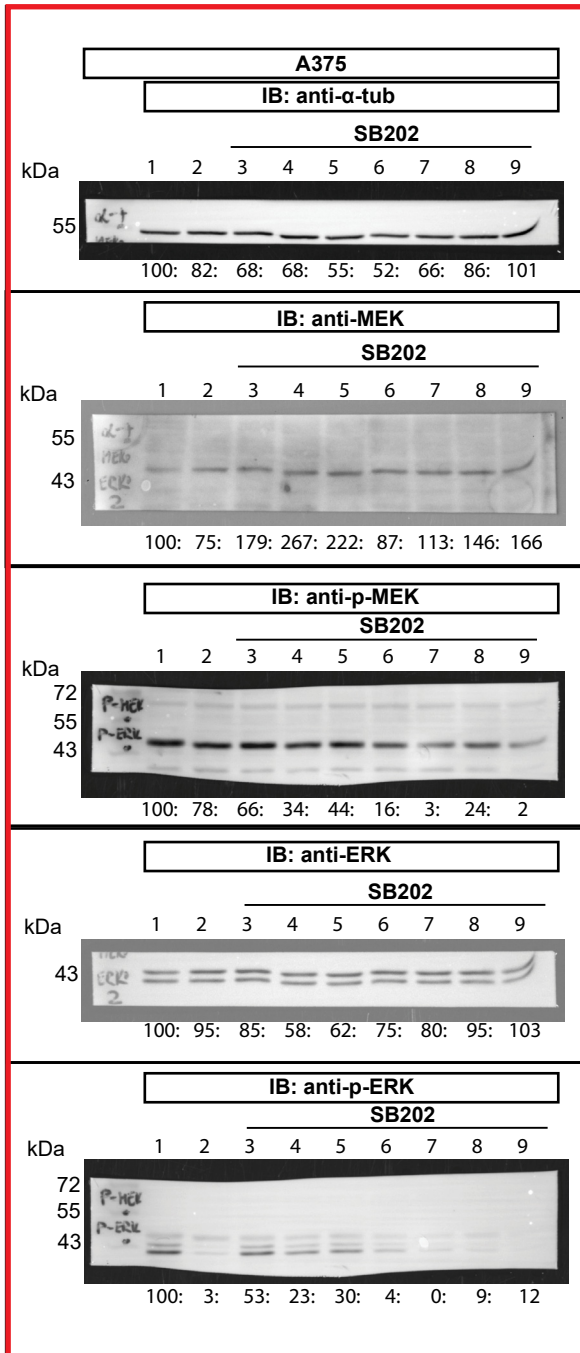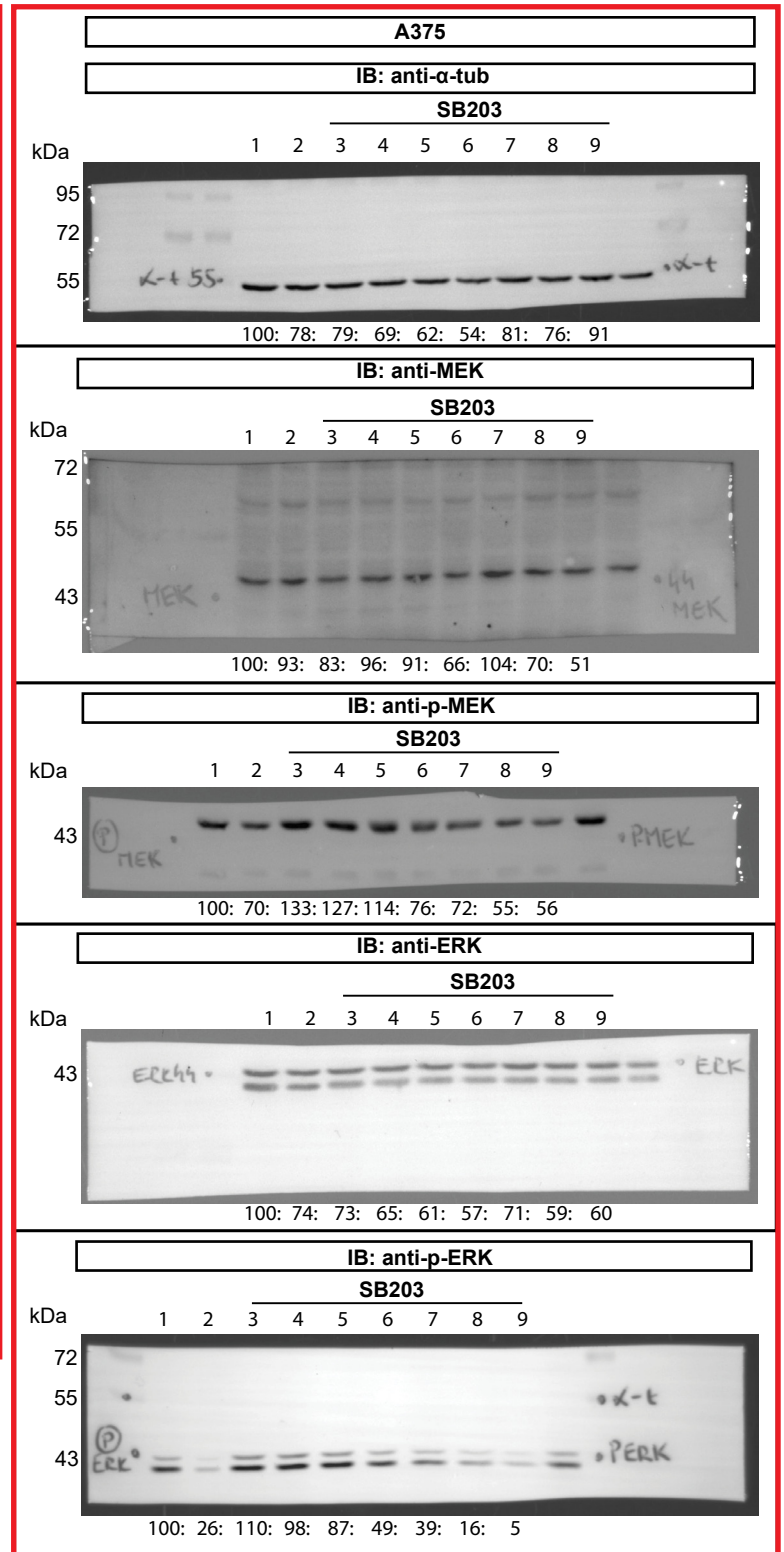

Figure 1D

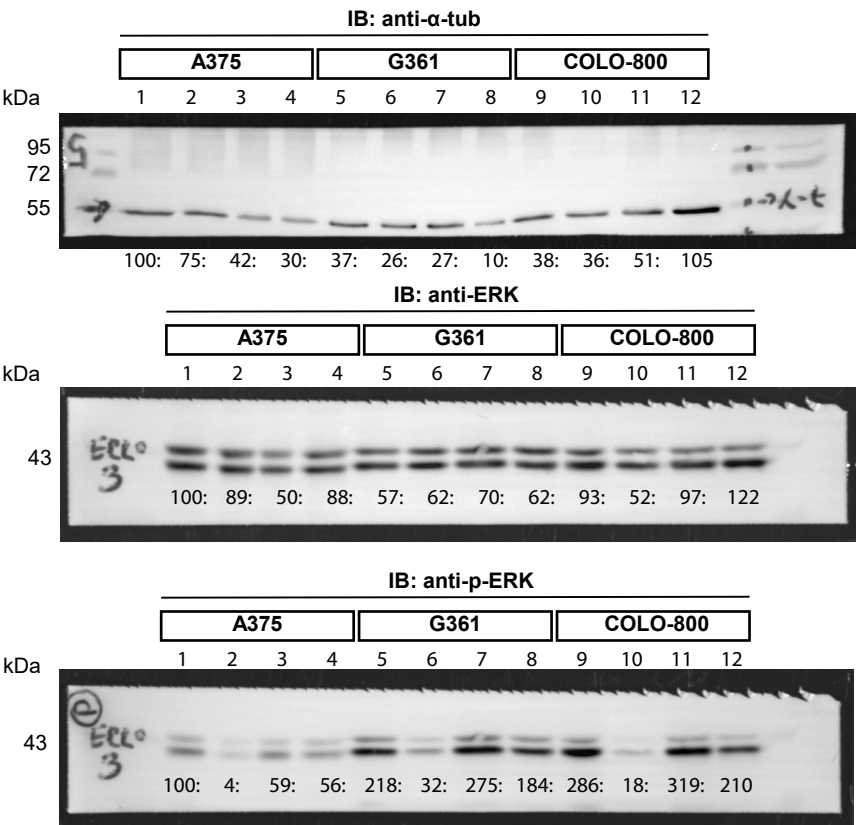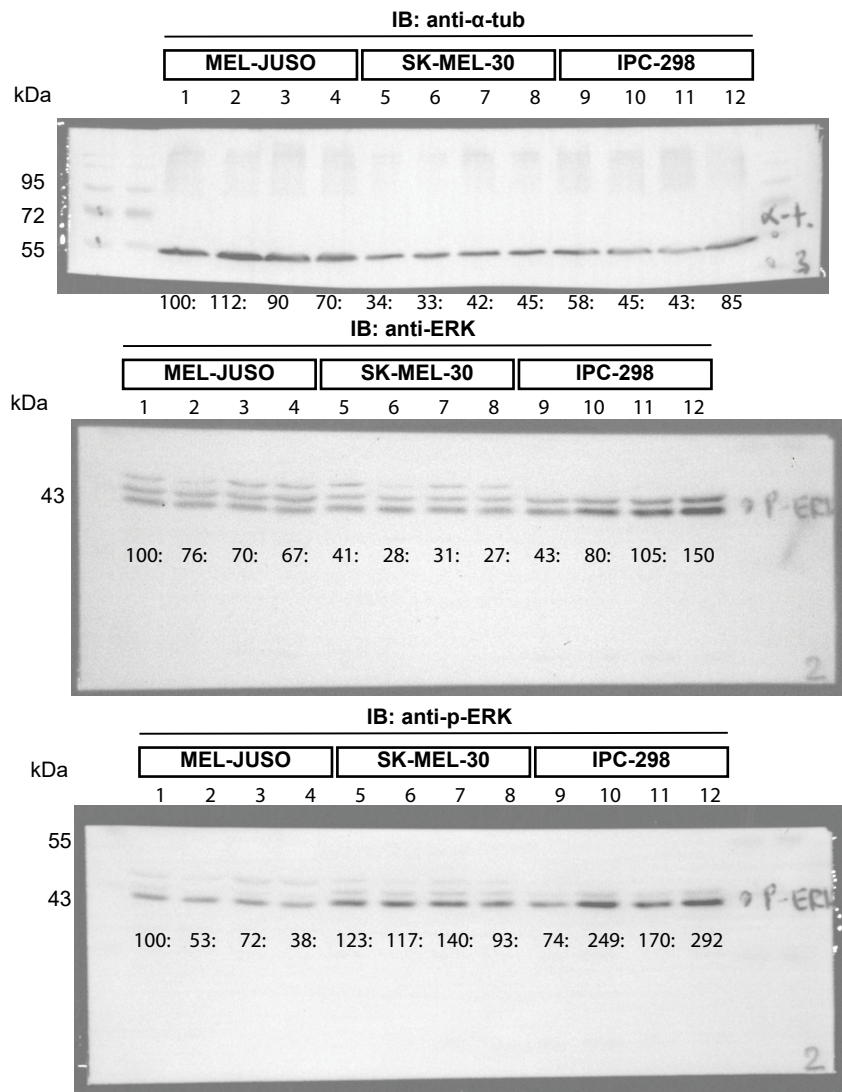

Figure 1E

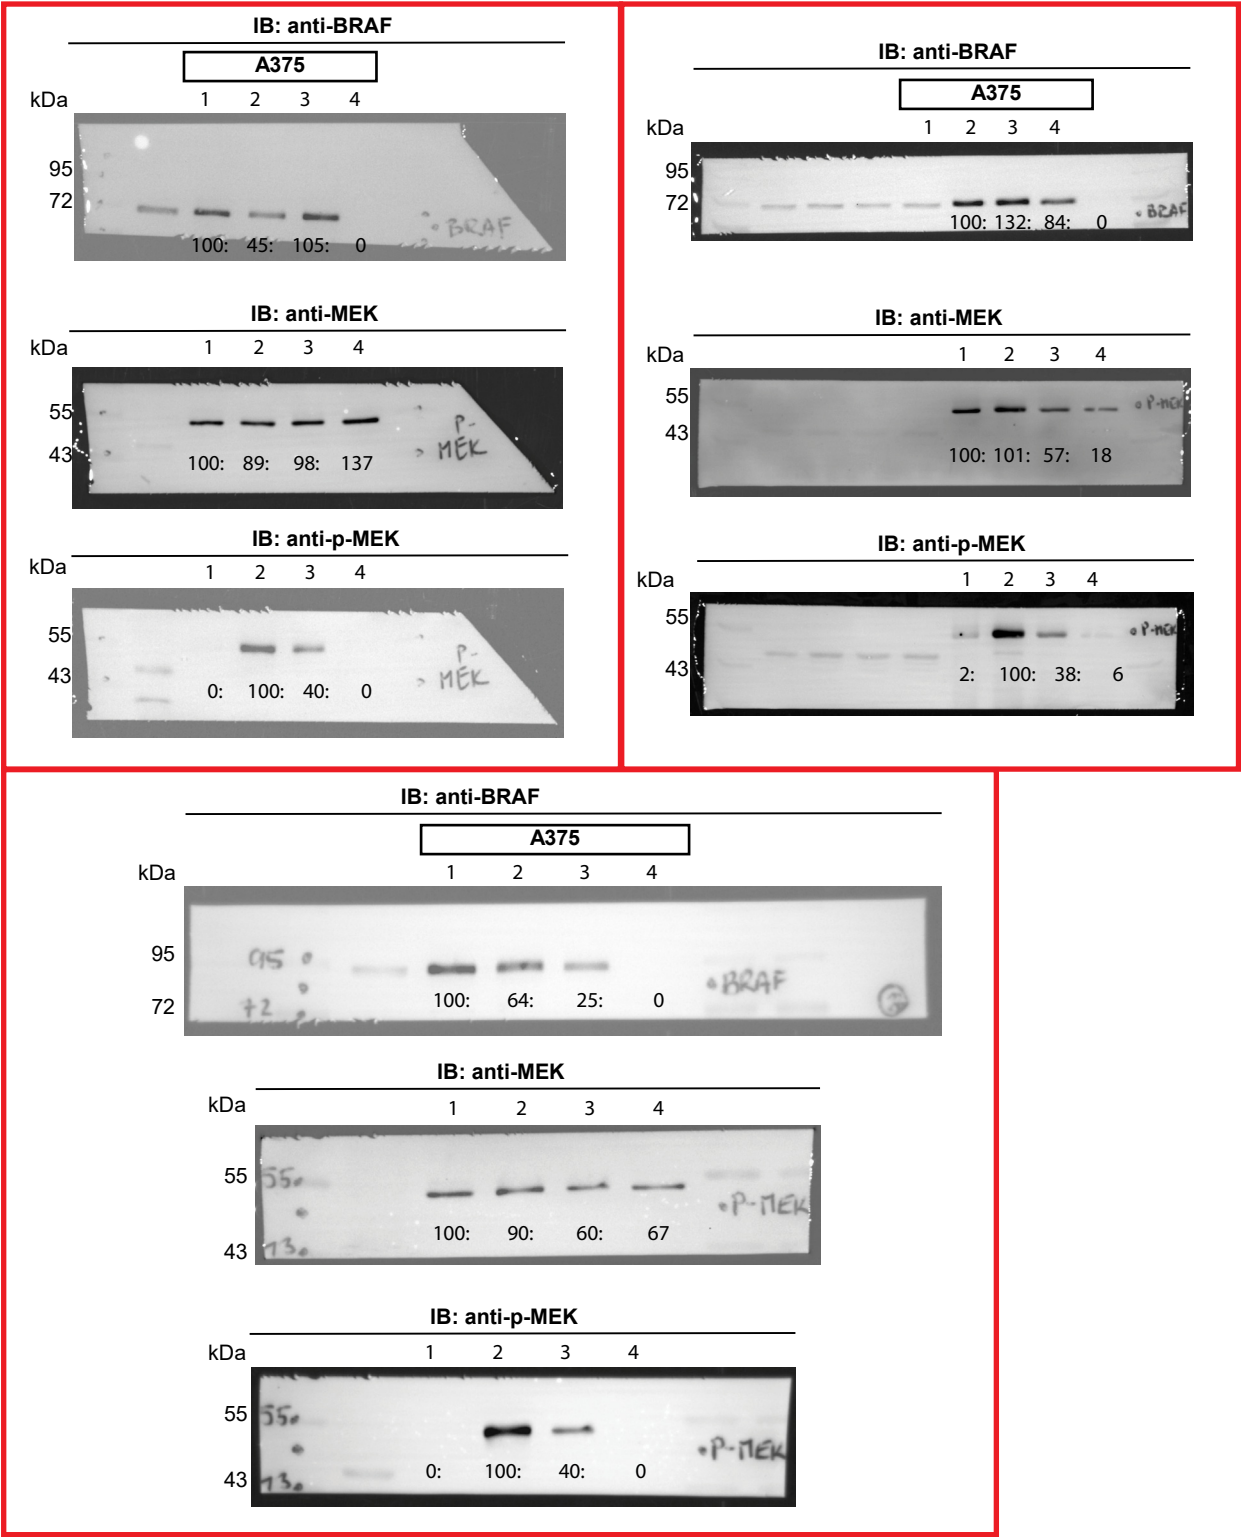

Figure 6C

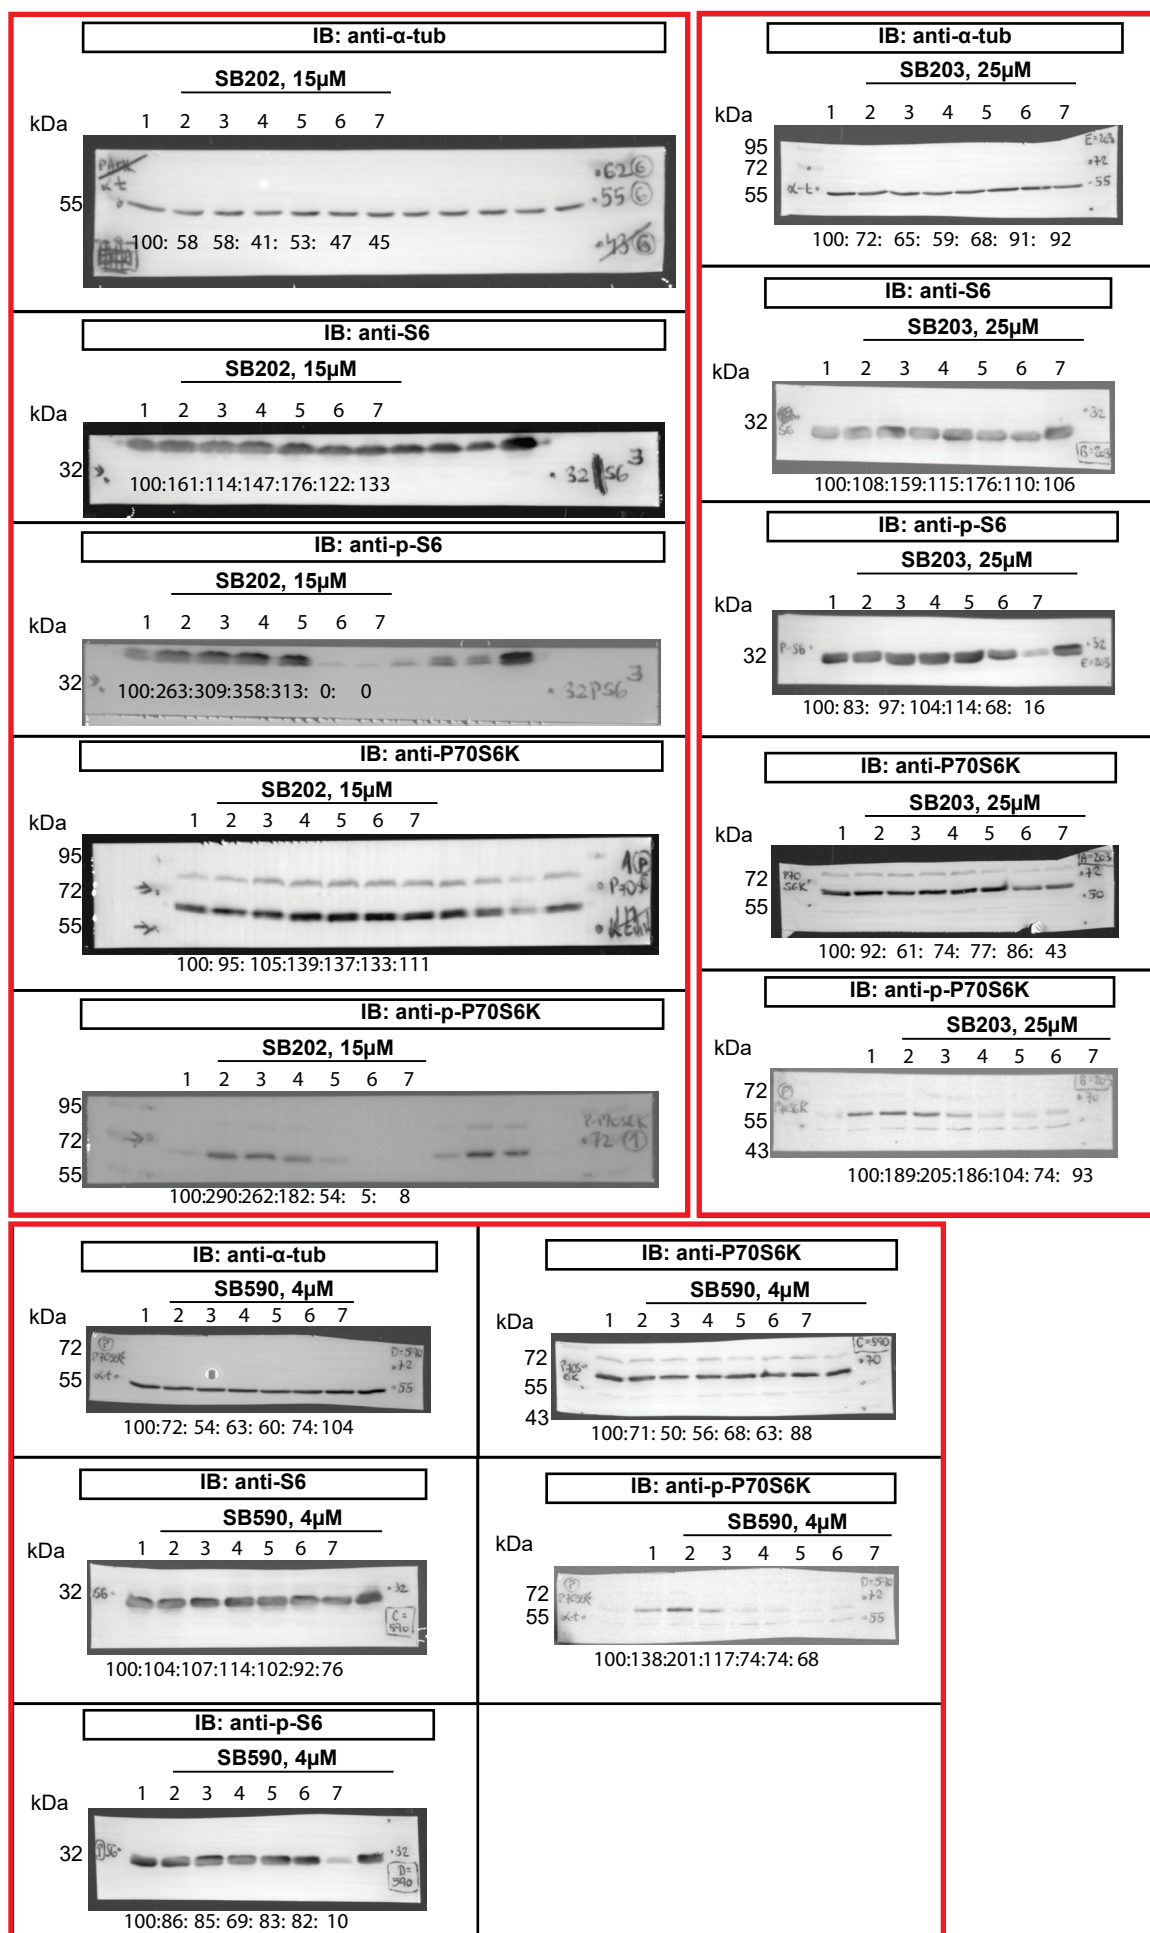

Figure 6E

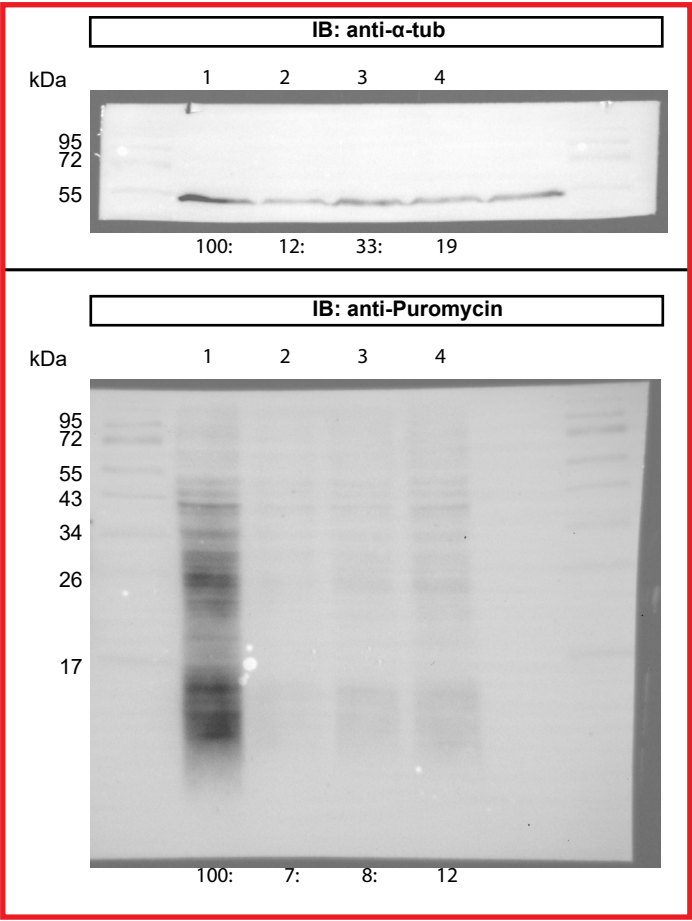

Supplement: s1 [file s1]
